# Supplementary material for: The microcephaly ASPM gene is expressed in proliferating tissues and encodes for a mitotic spindle protein
Source: Oxford University Press journal article supplement (doi:10.1093/hmg/ddi220), 2005-06-22
Supplement: ddi220_Supplementary_Data.zip [file ddi220_Supplementary_Data.zip]

## SUPPLEMENTARY MATERIAL

**Supplemental Table 1S      Primers used in this work**

| Oligonucleotide name                             | Sequence                                                  | Size of RT-PCR product(s) |
|--------------------------------------------------|-----------------------------------------------------------|---------------------------|
| <b>RT-PCR analysis of human ASPM transcripts</b> |                                                           |                           |
| <i>Exon2-exon3</i>                               |                                                           |                           |
| FN2-3/RN2-3                                      | 5'- ctgttaactggacaccactc -3'/5'- thtagtgggctcctaactct -3' | 258 bp                    |
| <i>Exon14-exon15</i>                             |                                                           |                           |
| FN14-15/RN14-15                                  | 5'-agacggccgtgtgttatgtt-3'/5'-agcaggtattccaccaaggt -5'    | 280 bp                    |
| <i>Exon1-exon28</i>                              |                                                           |                           |
| ASPM1F/ASPM28R                                   | 5'-tcctgtctctcagccacttc-3'/5'-atgccaaagcgatccatcac-3'     | 10,315 bp or 5,560 bp*    |
| F2-3/33-18R1                                     | 5'-ctgttaactggacaccactc-3'/5'-ctgcattttgtacctgaagga-3'    | 6,624 bp or 582 bp        |
| F2-3/33-18R2                                     | 5'-ctgttaactggacaccactc-3'/5'-gtgcatctctcgcacacctt-3'     | 6,686 bp or 644 bp        |
| Ex18R/Ex18F                                      | 5'-ataagcacgccaatgcctct-3'/5'-ccttcagatggctgtgtatc-3'     | 4,355 bp                  |
| Ex18R/AS17F                                      | 5'-ataagcacgccaatgcctct-3'/5'-gagttaatgcagcactcgtc-3'     | 277 bp                    |
| Ex18F/AS19R                                      | 5'-ccttcagatggctgtgtatc-3'/5'-gcaggaagtatagctctcca-3'     | 412 bp                    |
| <b>RT-PCR analysis of mouse Aspm transcripts</b> |                                                           |                           |
| ASm1F/ ASm28R                                    | 5'-tgctgttgctcagccactt-3'/5'-cttcacattatcacgcctc-3'       | 9,217 bp or 5,574 bp      |
| ASm17F/ ASm19R                                   | 5'-aaggaagttgcggatgctga-3'/5'-acagaaagtgtagctctccatt-3'   | 4,095 bp or 300 bp        |

\* The second product corresponds to an alternatively spliced variant.

**Supplemental Table 2S**      *ASPM* cDNA clones and deposited accessions

| <b>Identification</b>  | <b>Species</b> | <b>Accessions*</b> |
|------------------------|----------------|--------------------|
| Human splice variant 1 | Homo sapiens   | AY971956           |
| Human splice variant 2 | Homo sapiens   | AY971957           |
| Human splice variant 3 | Homo sapiens   | AY971955           |
| Mouse splice variant 1 | Mus musculus   | AY971958           |

\*GenBank accessions correspond to alternatively spliced variants identified in fetal brain and adult tissues.

**Supplemental Table 3S Expression of the *ASPM* gene in NIH-60 cancer cell lines**

| Sample number | Type number | Cancer type | Cell line   | Expression |
|---------------|-------------|-------------|-------------|------------|
| 1             | 1           | Leukemia    | K562        | +          |
| 2             | 1           | Leukemia    | MOLT4       | +          |
| 3             | 1           | Leukemia    | CCTF CEM    | +          |
| 4             | 1           | Leukemia    | RPMI 8226   | +          |
| 5             | 1           | Leukemia    | HL-60 TB    | +          |
| 6             | 1           | Leukemia    | SR          | +          |
| 7             | 2           | CNS         | SF 268      | +          |
| 8             | 2           | CNS         | SF 295      | +          |
| 9             | 2           | CNS         | SF 539      | +          |
| 10            | 2           | CNS         | SNB 19      | +          |
| 11            | 2           | CNS         | SNB 75      | +          |
| 12            | 2           | CNS         | U251        | +          |
| 13            | 3           | Breast      | BT549       | +          |
| 14            | 3           | Breast      | HS 578      | +          |
| 15            | 3           | Breast      | MCF 7       | +          |
| 16            | 3           | Breast      | NCI ADRRES  | +          |
| 18            | 3           | Breast      | MDA MB 435  | +          |
| 19            | 3           | Breast      | T-47 D      | +          |
| 20            | 4           | Colon       | Colo 205    | +          |
| 21            | 4           | Colon       | HCC 2998    | +          |
| 22            | 4           | Colon       | HCT 116     | +          |
| 23            | 4           | Colon       | HCT 15      | +          |
| 24            | 4           | Colon       | HT29        | +          |
| 25            | 4           | Colon       | KM12        | +          |
| 26            | 4           | Colon       | SW 620      | +          |
| 27            | 5           | NSCLC       | A549 ATCC   | +          |
| 28            | 5           | NSCLC       | EKVX        | +          |
| 29            | 5           | NSCLC       | HOP 62      | +          |
| 30            | 5           | NSCLC       | HOP 92      | +          |
| 31            | 5           | NSCLC       | NCI H 322 M | +          |
| 32            | 5           | NSCLC       | NCI H226    | +          |
| 33            | 5           | NSCLC       | NCI H23     | +          |
| 34            | 5           | NSCLC       | NCI H460    | +          |
| 35            | 5           | NSCLC       | NCI H522    | +          |
| 36            | 6           | Melanoma    | LOX IMVI    | +          |
| 37            | 6           | Melanoma    | M14         | +          |
| 38            | 6           | Melanoma    | MAL ME      | +          |
| 54            | 6           | Melanoma    | SK MEL 2    | +          |
| 55            | 6           | Melanoma    | SK MEL 5    | +          |
| 56            | 6           | Melanoma    | SK MEL 28   | +          |
| 57            | 6           | Melanoma    | UACC 62     | +          |
| 58            | 6           | Melanoma    | UACC 257    | +          |
| 39            | 7           | Ovarian     | IGROV 1     | +          |
| 40            | 7           | Ovarian     | OVCAR3      | +          |
| 41            | 7           | Ovarian     | OVCAR4      | +          |
| 42            | 7           | Ovarian     | OVCAR5      | +          |
| 43            | 7           | Ovarian     | OVCAR8      | +          |
| 44            | 7           | Ovarian     | SKOV3       | +          |
| 45            | 8           | Prostate    | DU 145      | +          |
| 46            | 8           | Prostate    | PC-3        | +          |
| 47            | 9           | Renal       | 786-0       | +          |
| 48            | 9           | Renal       | A498        | +          |
| 49            | 9           | Renal       | ACHN        | +          |
| 50            | 9           | Renal       | CAKI-1      | +          |
| 51            | 9           | Renal       | SN12C       | +          |
| 52            | 9           | Renal       | TK-10       | +          |
| 53            | 9           | Renal       | UO-31       | +          |

*ASPM* expression was checked by RT-PCR using primers FN2-3 and RN2-3 developed from exon 2 and exon 3 sequences (see Supplementary Material Table 1S).

## Supplemental Figure 1S

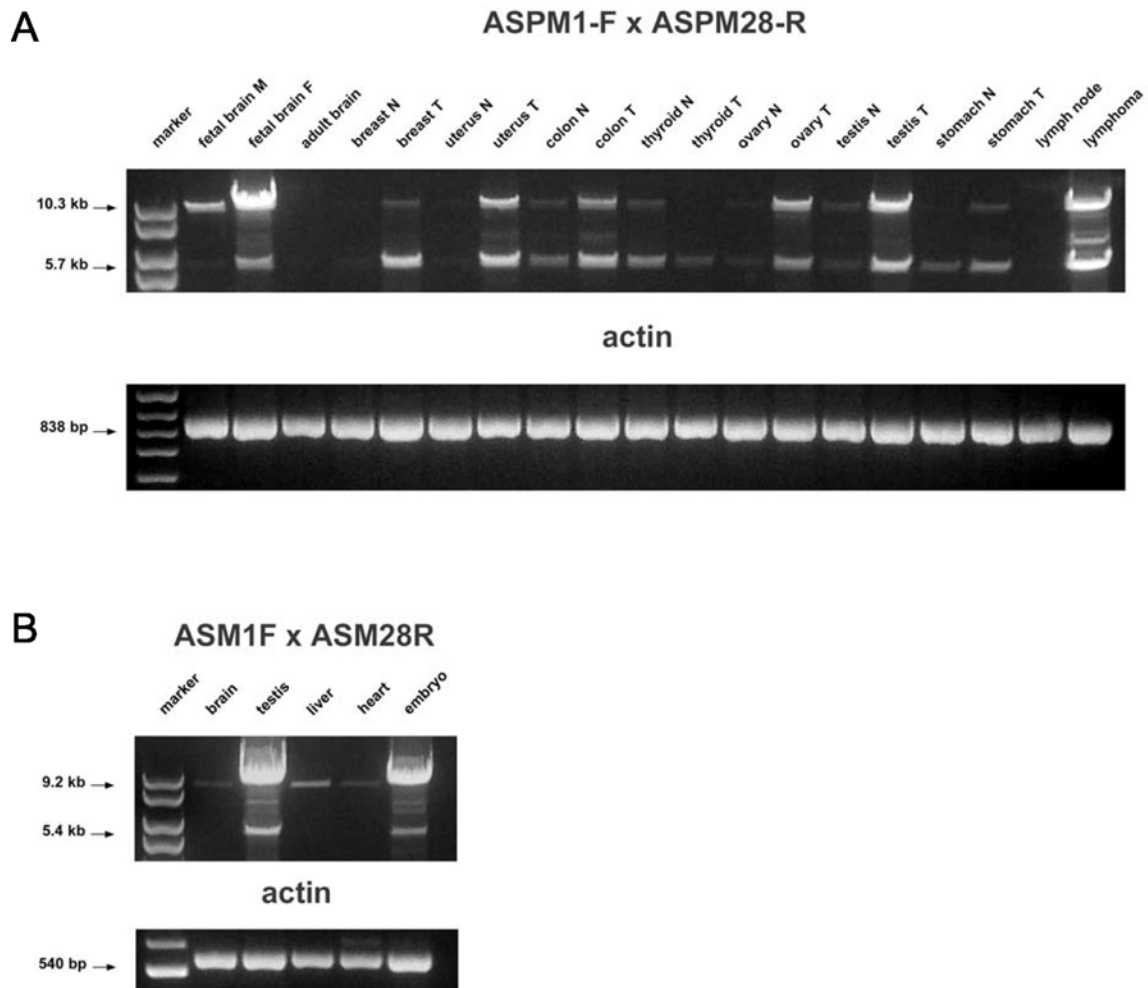

**Figure 1S (A)** RT-PCR expression of *ASPM* in human normal and matching tumor tissues. **(B)** RT-PCR expression of *Aspm* in mouse normal tissues.

## Supplemental Figure 2S

|                |                                                         |    |
|----------------|---------------------------------------------------------|----|
| IQ1:1241-1266  | IQTTWRKYKLKRD <del>LKH</del> QERDKAARV                  | 26 |
| IQ2:1267-1289  | IQSVVLN <del>FLSRRRLQKNV</del> SAAALV                   | 23 |
| IQ3:1290-1321  | IQK <del>CWRRVSAQRKLMLKNEKLAKLQNK</del> SAVL            | 32 |
| IQ4:1322-1344  | IQAYWRRYSTRK <del>FLRLKH</del> YSVI                     | 23 |
| IQ5:1345-1367  | LQSRIRMKIALTSYKRYLWATVT                                 | 23 |
| IQ6:1368-1394  | IQRHWRAYLSRKR <del>DQIFRKLKSS</del> SLV                 | 27 |
| IQ7:1395-1416  | IQFMFRWKRRLQLQTKAAVT                                    | 22 |
| IQ8:1417-1437  | LQRAFREWHLRKQIRERSAVV                                   | 21 |
| IQ9:1438-1460  | IQSWYRMHRELQKYIYIRSCVIV                                 | 23 |
| IQ10:1461-1483 | IQRRVRCFQAQKLYKRRKDAILT                                 | 23 |
| IQ11:1484-1510 | LQKH <del>YRARQK</del> GKLAHADY <del>LQKRAATIR</del>    | 27 |
| IQ12:1511-1533 | LQAAFRGMKARHSYRLQIGAACV                                 | 23 |
| IQ13:1534-1556 | LQSYWRMRQ <del>ERVFLNLK</del> KMVIK                     | 23 |
| IQ14:1557-1579 | LQAHIRKYQQLQKYKIKKAAIT                                  | 23 |
| IQ15:1580-1606 | IQTHFRASISARV <del>LASYQKTRSS</del> VIV                 | 27 |
| IQ16:1607-1629 | LQSACRGMQARKA <del>FRHALAS</del> VIK                    | 23 |
| IQ17:1630-1652 | IQSYRAYICRKTFQ <del>NFKNATIK</del>                      | 23 |
| IQ18:1653-1675 | LQSIVKMKQSRKQYLQIRAAALF                                 | 23 |
| IQ19:1676-1702 | IQRWYRSQKLASQ <del>KRKEYIQVRES</del> CIK                | 27 |
| IQ20:1703-1725 | LQSHFRGCLVRKQLRLQCKAAIS                                 | 23 |
| IQ21:1726-1748 | LQSYFRMRTARQRYLK <del>MCKAALV</del>                     | 23 |
| IQ22:1749-1775 | IQSFYCAYRAQISOR <del>NFLQVKRAAIC</del>                  | 27 |
| IQ23:1776-1798 | LQAA <del>YRGCKVRRQIKQOSTAAVT</del>                     | 23 |
| IQ24:1799-1821 | IQRVFRGHSQRMKYQ <del>TMLQSAVK</del>                     | 23 |
| IQ25:1822-1848 | IQRWYRAQKVAYDMRIQ <del>FLKTREAVVC</del>                 | 27 |
| IQ26:1849-1871 | LQSA <del>YRGWQVRQQLRRQHEAAVK</del>                     | 23 |
| IQ27:1872-1894 | IQSTFRMAVAQ <del>QYKLRLRAAAV</del>                      | 23 |
| IQ28:1895-1921 | IQQHVRARAAGKROH <del>LAYQLRHAALV</del>                  | 27 |
| IQ29:1922-1944 | FQA <del>AWKGMRLRQIARQH</del> QCAAL                     | 23 |
| IQ30:1945-1967 | IQSYRMHIQRRKWSIMKTAALQ                                  | 23 |
| IQ31:1968-1994 | IQLCYRAYKVGKEQRHLYLKT <del>KAAVVT</del>                 | 27 |
| IQ32:1995-2017 | LQSA <del>YRGMKVRKVAECHKAAVT</del>                      | 23 |
| IQ33:2018-2040 | IQSKFRAYRTQKKYTT <del>YRTSAIV</del>                     | 23 |
| IQ34:2041-2067 | IQRWYRNKITTQ <del>QHQEYLNLRRAVQ</del>                   | 27 |
| IQ35:2068-2090 | VQA <del>AYRGI</del> VRRRIQHMHMAATL                     | 23 |
| IQ36:2091-2113 | IEAMFKMRQSRVRYLKMRTAALI                                 | 23 |
| IQ37:2114-2140 | IQVRYRAYYLGKIQHEKYL <del>RTLKA</del> IKT                | 27 |
| IQ38:2141-2163 | LQAGVRGARVRR <del>TVRKM</del> HFAATL                    | 23 |
| IQ39:2164-2186 | IQSHFRGHRQ <del>TYFHRLRKAATM</del>                      | 23 |
| IQ40:2187-2213 | VQORYRAVKEGSAEFQ <del>RYSRLLRSVLL</del>                 | 27 |
| IQ41:2214-2236 | IQAAFRGLRTRRH <del>LKAMHLAATL</del>                     | 23 |
| IQ42:2237-2259 | IQRRFRTFAMRRKFLSLRKT <del>AIW</del>                     | 23 |
| IQ43:2260-2285 | IQQYRARLYAKYSRQ <del>QLLLEKAVIK</del>                   | 26 |
| IQ44:2286-2308 | IQSSYRGWVVRKRVQ <del>KMHRAATV</del>                     | 23 |
| IQ45:2309-2331 | IQATFRMHGAYMRYQH <del>LKRA</del> SVV                    | 23 |
| IQ46:2332-2349 | IQVHTAAELQ <del>RQKHA</del> AVI                         | 18 |
| IQ47:2350-2372 | LQAAVRGMKTRSHL <del>KTMHSSATL</del>                     | 23 |
| IQ48:2373-2395 | IQSQFRAFIVRRFIALR <del>KAAIF</del>                      | 23 |
| IQ49:2396-2422 | VQRKFRATLYAKHKLH <del>QFLQLRKAAIT</del>                 | 27 |
| IQ50:2423-2445 | IQSSYRRIMVQK <del>KLQEMHRAAAL</del>                     | 23 |
| IQ51:2446-2468 | IQATFRMHTYVAFHIW <del>KCASIR</del>                      | 23 |
| IQ52:2469-2497 | IQQC <del>YRTYRTIKLQKEKLI</del> REEQHSAAVL              | 29 |
| IQ53:2498-2520 | IQSTYRMYRQRCFYQ <del>QRRWAAKV</del>                     | 23 |
| IQ54:2521-2544 | IQKTYRANKRRQD <del>LLYVCKEETPL</del>                    | 24 |
| IQ55:2545-2567 | LQMHFQGLNTAKQ <del>GRQHGAA</del> MI                     | 23 |
| IQ56:2568-2586 | TQKHFRAFKARRLME <del>AEERG</del>                        | 19 |
| IQ57:2587-2608 | EQAGCRKYKAKKYL <del>SKVEAACR</del>                      | 22 |
| IQ58:2609-2631 | IQAWYRRWR <del>AHKKYLTL</del> LKAVNI                    | 23 |
| IQ59:2632-2654 | IEGYLSAQLARRR <del>FLKMR</del> AAAI                     | 23 |
| IQ60:2655-2680 | IQRKWRATLSVRGARE <del>NLKRHRAACV</del>                  | 26 |
| IQ61:2681-2703 | IQAHFRGYQARQS <del>FLQQRSAVL</del> I                    | 23 |
| IQ62:2704-2730 | IQRHVRAMVAAKQERIKY <del>IKLKSTTVV</del>                 | 27 |
| IQ63:2731-2768 | VQALVRGWLVRKRVSEQK <del>AKTRLFHF</del> TAAAYCHMCALK     | 38 |
| IQ64:2769-2791 | IQRAYRLHVTL <del>RLNAKHMDSVIF</del>                     | 23 |
| IQ65:2792-2832 | IQRWFRKRLQ <del>RKRFTIEQYHKILSTR</del> REAHACWLQDDRAASV | 41 |
| IQ66:2833-2855 | IQKAVRRFLLCRRQ <del>EKITSCATR</del>                     | 23 |
| IQ67:2856-2878 | IQALWRGYSWR <del>KKNDHTEIKAIR</del>                     | 23 |

splice variant 1

**Figure 2S Structure and evolution of mouse Aspm IQ repeats.** The left column shows the number of IQ repeats and their positions in the full-length ASPM protein; the right column shows the length of the individual repeat. The red positions mark sites that are different between the mouse and rat proteins.
